# Supplementary figures and images for: Reducing the Risk of Benthic Algae Outbreaks by Regulating the Flow Velocity in a Simulated South–North Water Diversion Open Channel
Source: MDPI journal article supplement (doi:10.3390/ijerph20043564), 2023-02-17

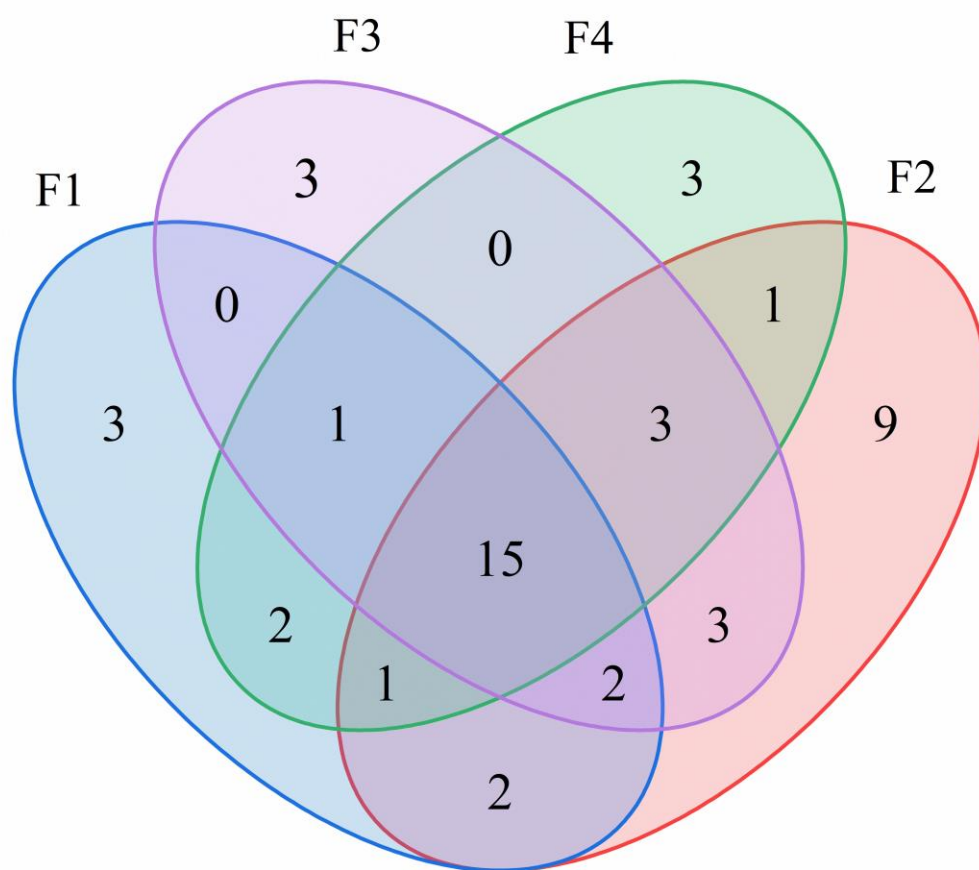

**Figure S1.** Differences in the number of species between each channel section.

Supplement: s1 [file s1]
